# Supplementary material
Source: MDPI journal article supplement (https://www.mdpi.com/2073-4395/11/11/2350)

**Figure S1.** Changes of electrical conductivity (A) and pH (B) of nutrient solutions during hydroponic culture.

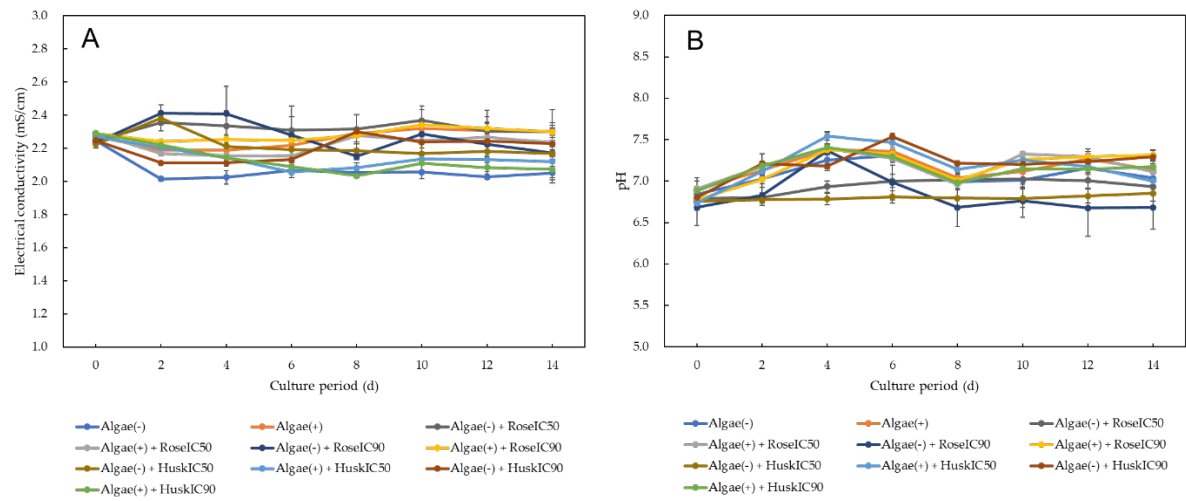

Supplement: s1 [file s1]
